# Supplementary material
Source: PubMed Central journal article supplement (PMC4403397)
Supplement: JVI.03723-14_zjv999090171so1.pdf [file JVI.03723-14_zjv999090171so1.pdf]

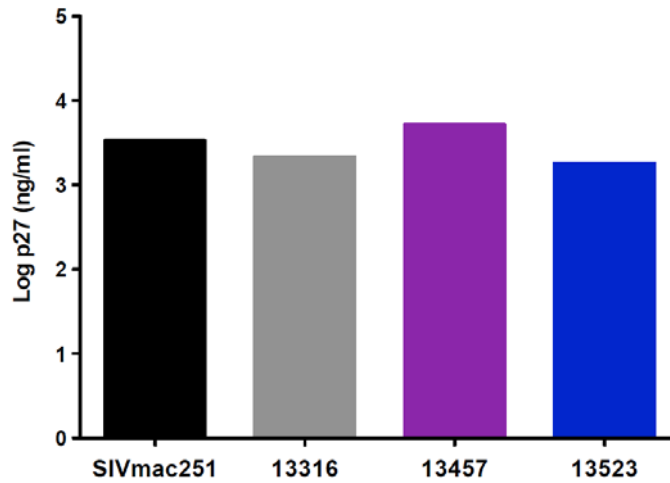

**Supplementary Figure 1: replication capacity of viral isolates.** Viral isolates from controller macaques #13316, #13457 and #13523 were obtained upon in vitro activation of CD4<sup>+</sup> T cells and culture for 2 weeks. A similar amount of 200 ng of p27/10<sup>6</sup> cells of these isolates and of the original virus used to expose the animals (SIVmac251) was used to infect primary CD4 T cells from a healthy CyM. Peak viral replication is shown.

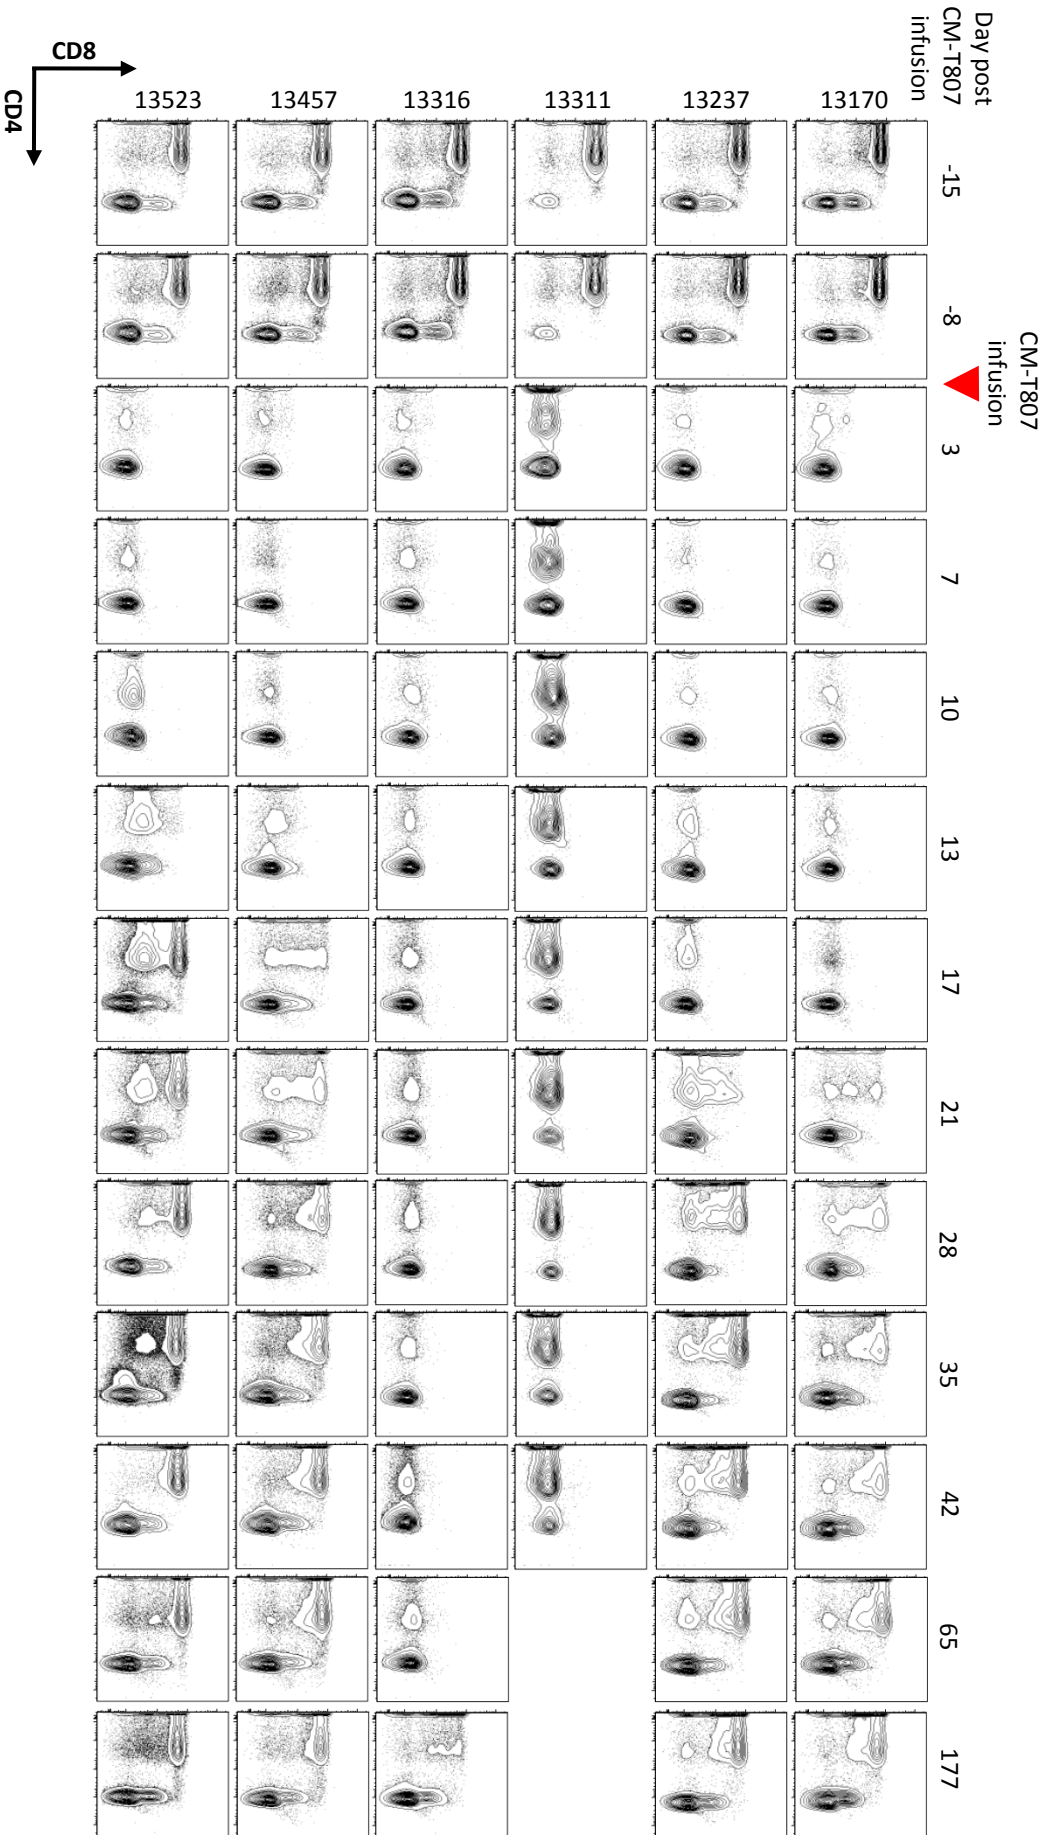

**Supplementary Figure 2: Dot plots illustrating CD8<sup>+</sup> T-cell depletion in peripheral blood after CM-T807 mAb infusion. CD4/CD8 dot plots are gated on CD45<sup>+</sup>CD3<sup>+</sup> cells and plots for each time point of the depletion experiment for the six macaques of the 5 AID<sub>50</sub> group are shown.**

**A**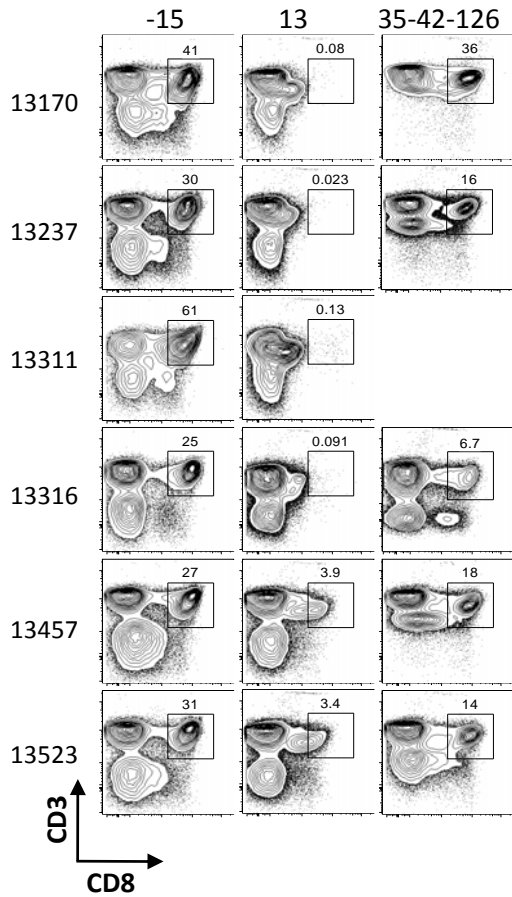**B**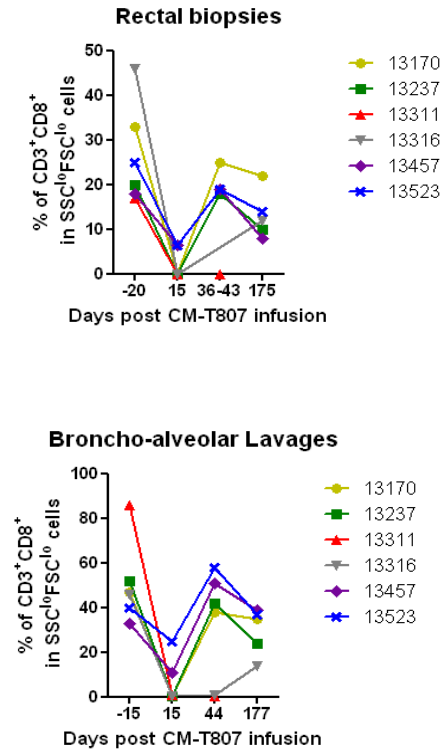

**Supplementary Figure 3: Evolution of CD8<sup>+</sup> T cells in the lymph nodes, rectum and broncho-alveolar lavage in the depletion experiment for the six macaques of the 5 AID<sub>50</sub> group. (A) Dot plots illustrating CD8<sup>+</sup> T-cell depletion in lymph nodes after CM-T807 mAb infusion. (B) Evolution of CD8<sup>+</sup> T cells in RB (upper graph) and BAL (lower graph) samples by flow cytometry. CD3<sup>+</sup>CD8<sup>+</sup> T cells were gated in CD45<sup>+</sup> cells.**

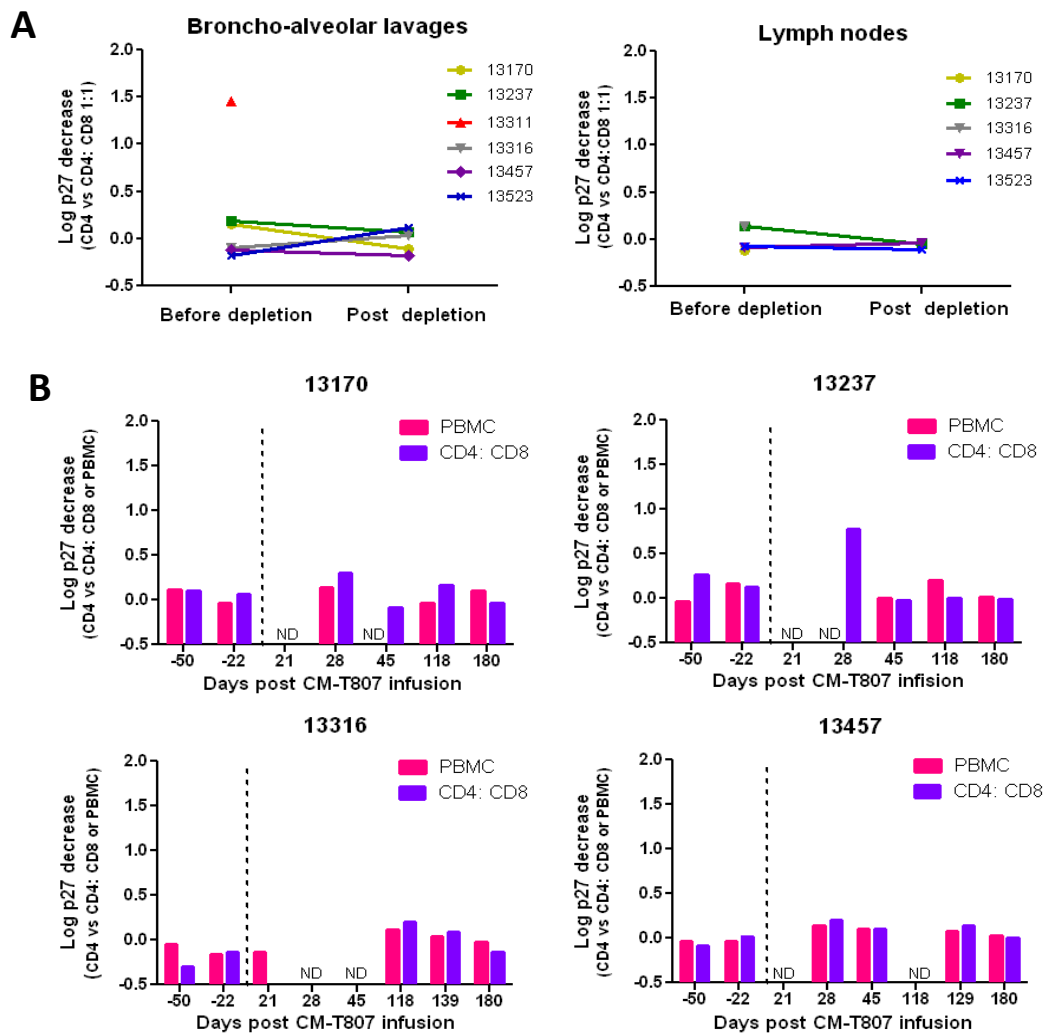

**Supplementary Figure 4: Evolution of SIV suppressive activity of peripheral and tissue CD8 T cells. (A)** Evolution of suppressive capacity of CD8<sup>+</sup> T-cells isolated from lymph nodes and broncho-alveolar lavages before depletion and after CD8<sup>+</sup> T-cell recovery. **(B)** Suppression of SIV replication measured in both PBMC and CD4:CD8 cocultures (ratio 1:1) in comparison to isolated cultures of infected CD4<sup>+</sup> T cells from macaques #13170, #13237, #13457 and #13316.

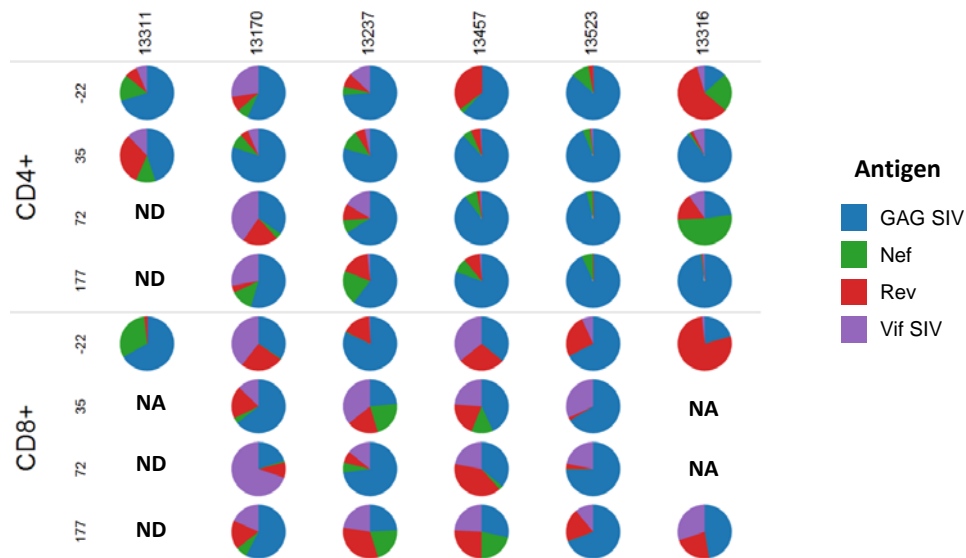

**Supplementary Figure 5: Evolution of T-cell responses specific for the individual ORFs that were examined- Gag, Rev, Vif, and Nef- as assayed by intra cellular staining, after stimulation with overlapping peptide pools.** Data are presented as the proportion of each antigen-specific response within total responding cells (being at least positive for one cytokine including IFN $\gamma$ , TNF $\alpha$ , MIP1b and IL-2). The proportions of cells responding to Gag (Blue), Nef (Green), Rev (Red), or Vif (Violet) are displayed in each pie. ND= not done (13311 died before day72). NA=Not applicable (when samples did not contain enough CD8+ T cells). 13311 died before any reconstitution of CD8+ cells and 13316 exhibited extremely late partial reconstitution of CD8+ cells (See Figure 3C).

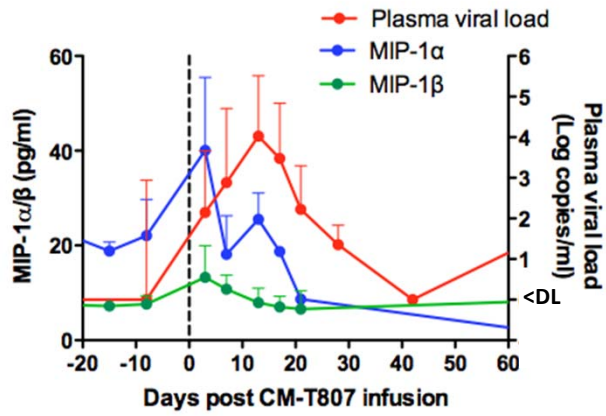

**Supplementary Figure 6: Evolution of concentrations of b-chemokines in plasma.** Temporal association between plasma  $\beta$ -chemokine concentrations and plasma viral load in SIV controllers. Median and range are shown.

**Supplementary Table 1 : Monoclonal antibodies used for immunophenotyping**

| Cluster       | Clone     | Fluorochrome    | Manufacturer    |
|---------------|-----------|-----------------|-----------------|
| CD3           | SP34.2    | APC-Cy7         | BD Pharmingen   |
| CD3           | SP34.2    | Alexa Fluor 700 | BD Biosciences  |
| CD3           | SP34.2    | Horizon v500    | BD Biosciences  |
| CD4           | L200      | PerCP-Cy5.5     | BD Biosciences  |
| CD4           | L200      | PE              | BD Biosciences  |
| CD4           | L200      | PE-Cy7          | BD Biosciences  |
| CD8           | RPA-T8    | Horizon v500    | BD Biosciences  |
| CD8           | BW135/80  | VioBlue         | Miltenyi        |
| CD8           | DK25      | Pacific Blue    | Dako            |
| CD28          | CD28.2    | ECD             | Beckman Coulter |
| CD38          | AT-1      | FITC            | StemCell        |
| CD45          | D058-1283 | PerCP           | BD Biosciences  |
| CD45RA        | L48       | PE-Cy7          | BD Biosciences  |
| CD69          | FN50      | PE-Cy7          | Ozyme           |
| CD69          | FN50      | APC-Cy7         | Ozyme           |
| CD95          | DX2       | APC             | BD Bioscience   |
| CD154         | TRAP1     | FITC            | BD Pharmingen   |
| CD195 (CCR5)  | 3A9       | PerCP-Cy5.5     | BD Biosciences  |
| CD197 (CCR7)  | FAB197P   | PE              | R&D             |
| HLA-DR        | L243      | APC-H7          | BD Biosciences  |
| Ki67          | MIB-1     | FITC            | DAKO            |
| MIP-1 $\beta$ | D21-1351  | PE              | BD Biosciences  |
| IFN $\gamma$  | B27       | V450            | BD Biosciences  |
| IL-2          | MQ1-17H12 | APC             | BD Pharmingen   |
| TNF $\alpha$  | MAb11     | Alexa Fluor 700 | BD Pharmingen   |
